# Supplementary figures and images for: Cytotoxic lymphocytes are dysregulated in multisystem inflammatory syndrome in children
Source: PubMed Central journal article supplement — medRxiv. 2020 Sep 2:2020.08.29.20182899. Preprint. [Version 1] doi: 10.1101/2020.08.29.20182899 (PMC7480058; doi:10.1101/2020.08.29.20182899), 2020-09-02

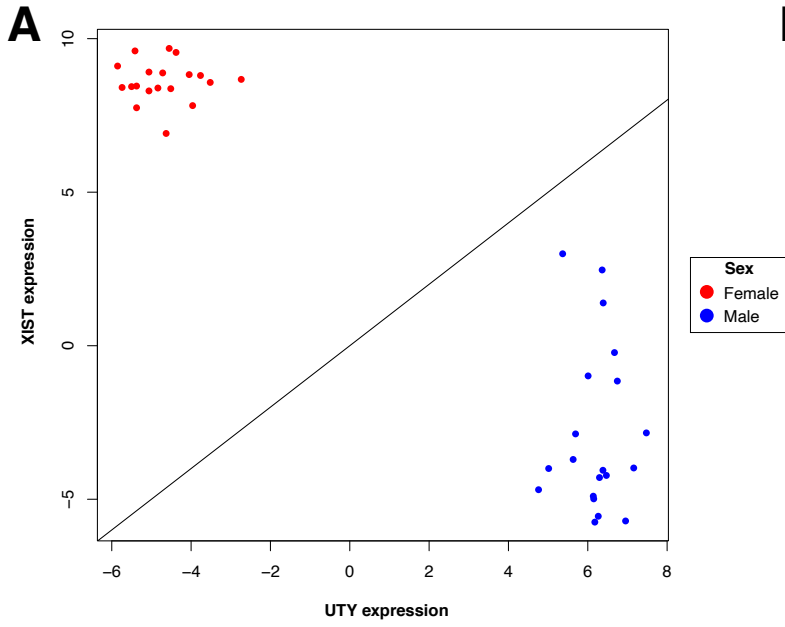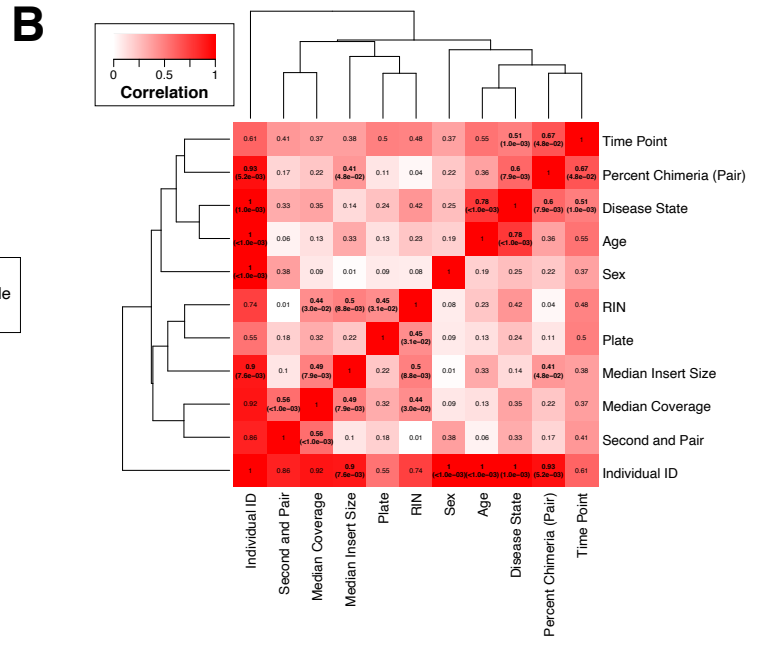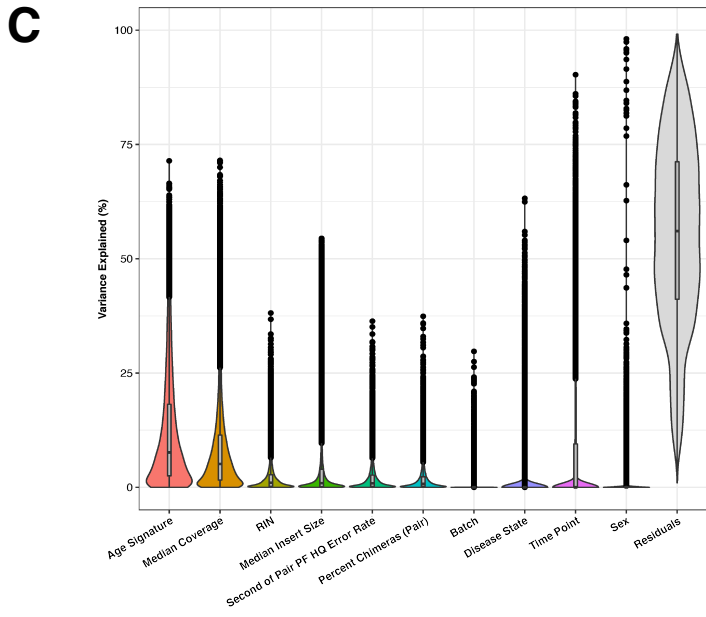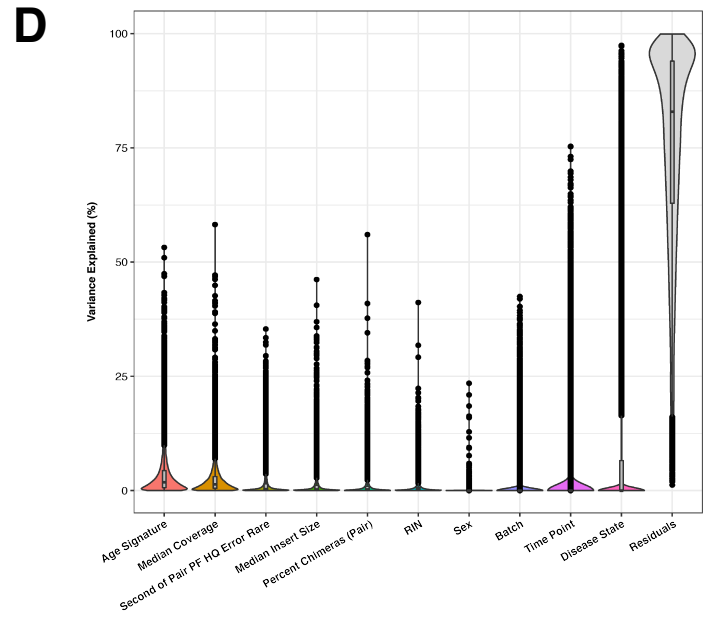

Supplement: 95058-2020.08.29.20182899-1.pdf [file 95058-2020.08.29.20182899-1.pdf]

**A**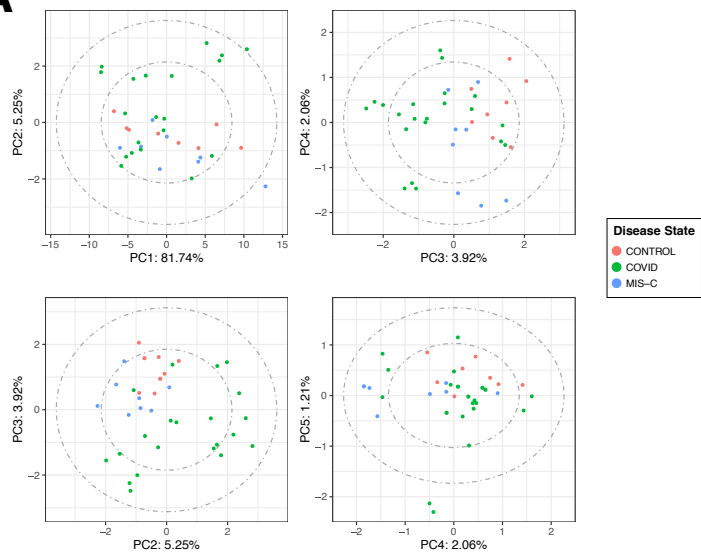**B**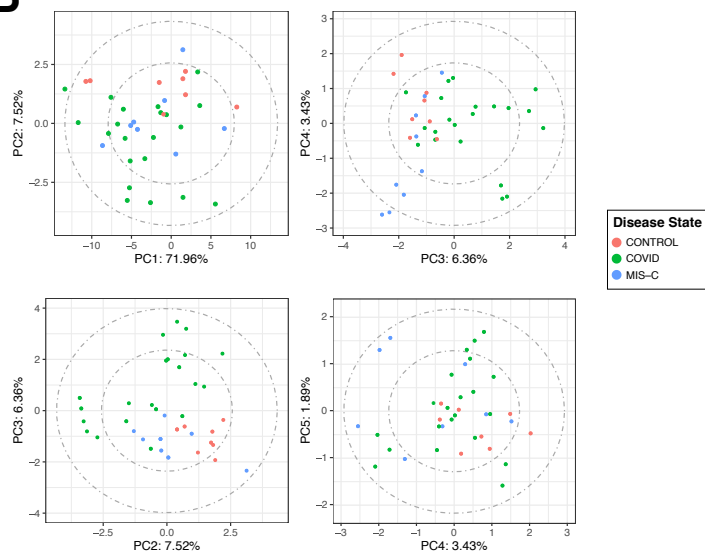

Supplement: 95058-2020.08.29.20182899-2.pdf [file 95058-2020.08.29.20182899-2.pdf]

**A**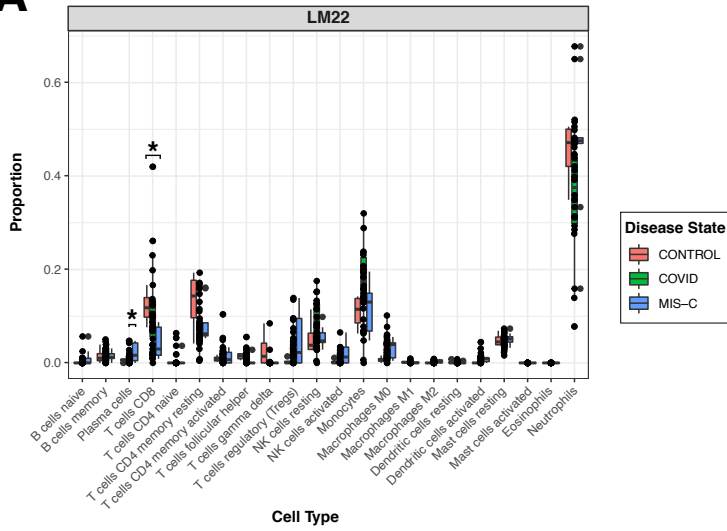**B**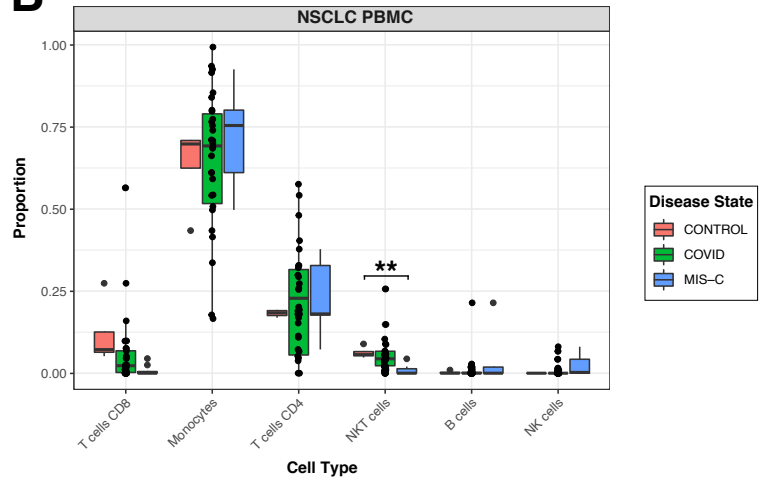**C**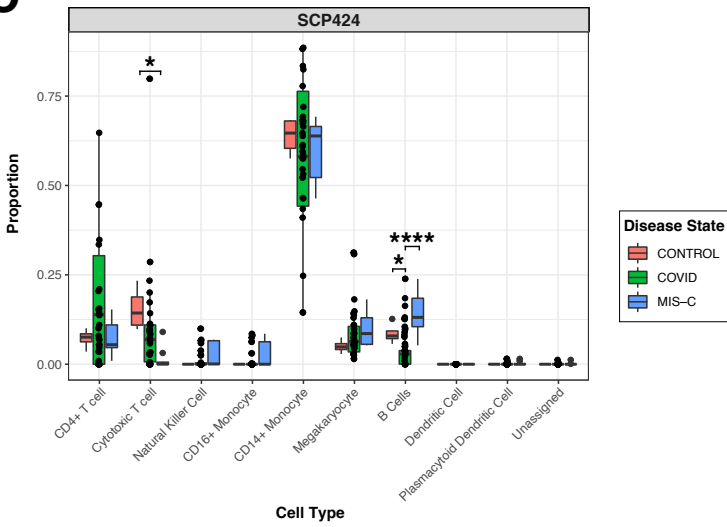**D**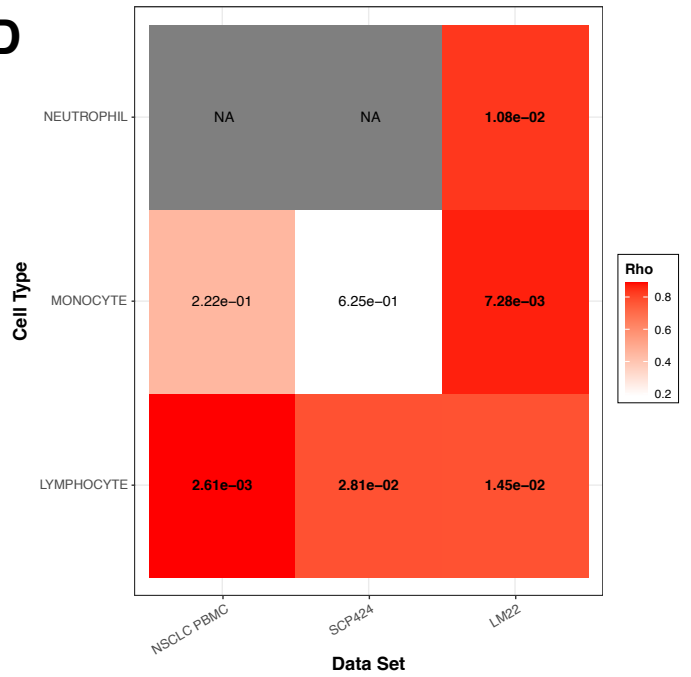

Supplement: 95058-2020.08.29.20182899-3.pdf [file 95058-2020.08.29.20182899-3.pdf]

# Cell Type

## Module

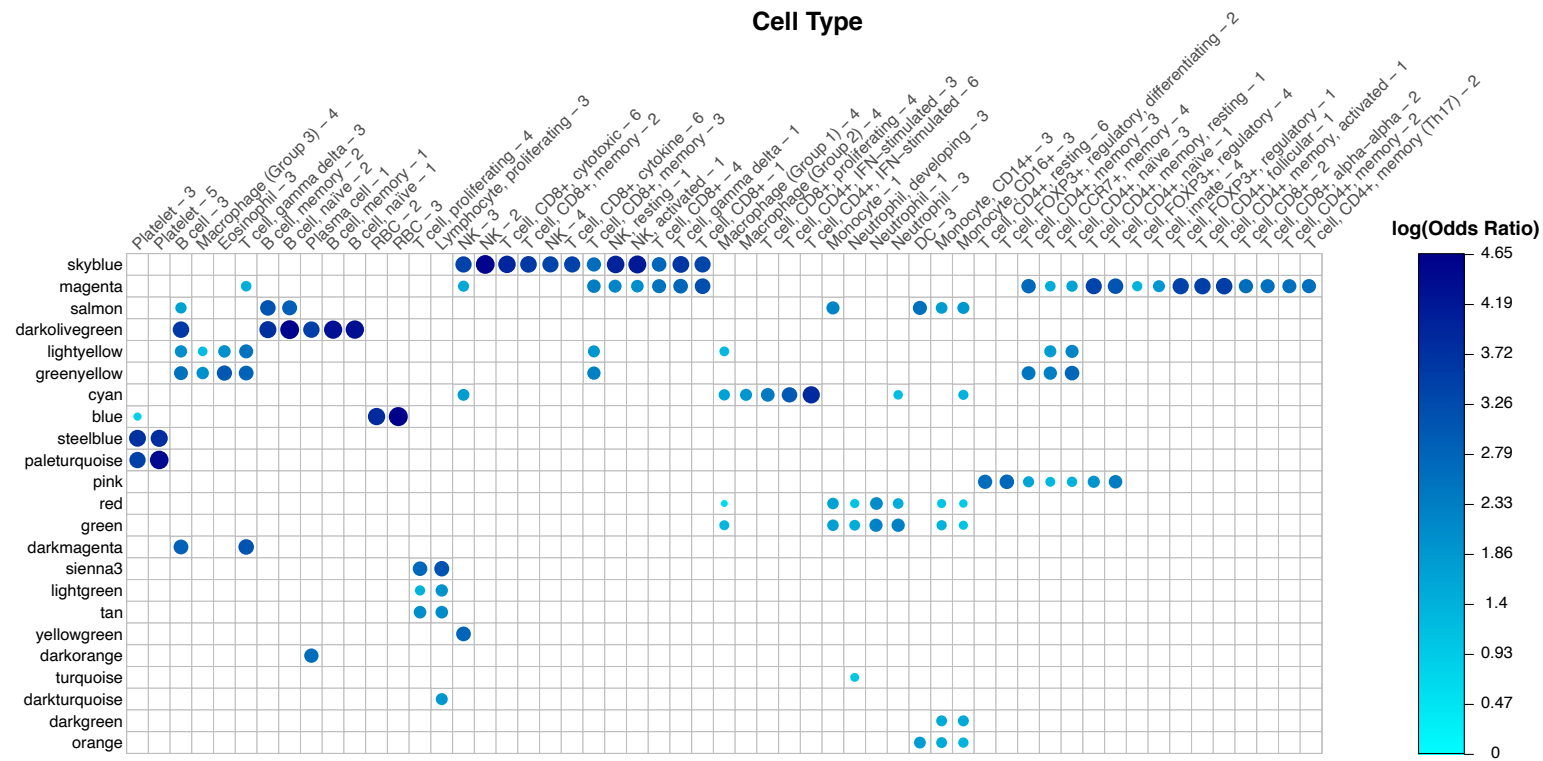

Supplement: 95058-2020.08.29.20182899-4.pdf [file 95058-2020.08.29.20182899-4.pdf]

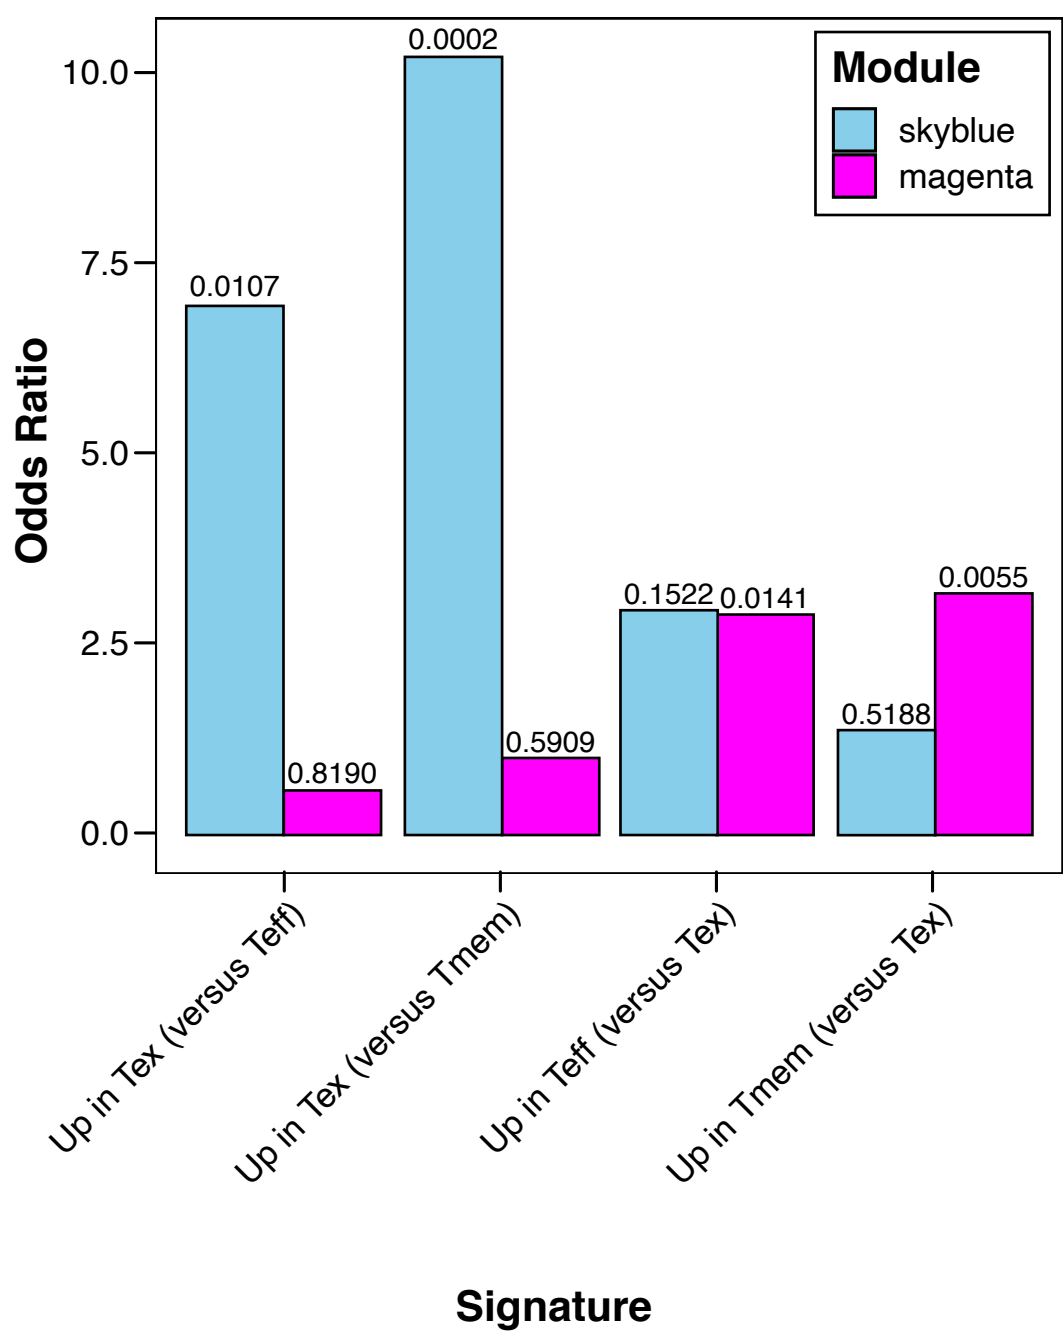

Supplement: 95058-2020.08.29.20182899-5.pdf [file 95058-2020.08.29.20182899-5.pdf]
